# Supplementary material for: Sulfide ions as modulators of metal–thiolate cluster size in a plant metallothionein
Source: Royal Society of Chemistry journal article supplement (doi:10.1039/c3dt32438a), 2013-01-01
Supplement: c3dt32438a.pdf [file c3dt32438a.pdf]

## **Supplementary Material**

to

**Sulfide ions as modulators of metal-thiolate cluster size  
in a plant metallothionein**

**Tamara Huber · Eva Freisinger**

## Sulfide ions as modulators of metal-thiolate cluster size: Supplementary Material

Vector pGtMT (modified pGEX-4T-1)

```
1 acgttatcga ctgcacgggt caccaatgct tctggcgtca ggcagccatc ggaagctgtg
61 gtatggctgt gcaggctcga aatcactgca taattcgtgt cgctcaaggc gcaactcccgt
121 tctggataat gttttttgcg ccgacatcat aacggttctg gcaaatattc tgaaatgagc
181 tgttgacaat taatcatcgg ctcgataaat gtgtggaatt gtgagcggat aacaatttca
241 cacaggaaac agtattcatg tcccctatac taggttattg gaaaattaag ggccttgtgc
301 aacccactcg acttcttttg gaatatcttg aagaaaaata tgaagagcat ttgtatgagc
361 gcgatgaagg tgataaatgg cgaacaaaa agtttgaatt gggtttgag tttcccaatc
421 ttccttatta tattgatggt gatgttaaat taacacagtc tatggccatc atacgttata
481 tagctgacaa gcacaacatg ttgggtggtt gtccaaaaga gcgtgcagag atttcaatgc
541 ttgaaggagc ggttttggat attagatacg gtgtttcgag aattgcatat agtaaagact
601 ttgaaactct caaagttgat tttcttagca agctacctga aatgctgaaa atgttcgaag
661 atcgtttatg tcataaaaca tatttaaatg gtgatcatgt aaccatcct gacttcatgt
721 tgtatgacgc tcttgatggt gttttataca tggacccaat gtgctggat gcgttcccaa
781 aattagtttg ttttaaaaaa cgtattgaag ctatcccaca aattgataag tacttgaaat
841 ccagcaagta tatagcatgg cctttgcagg gctggcaagc cacgtttggt ggtggcgacc
901 atcctccaaa atcggatctg gttccgcgtg gatccgagaa cctttacttc caatcctgct
961 gtggcggcaa ttgtgggtgt ggaagcagct gcaaatgcgg gagtggctgt ggcggctgca
1021 agatgtatcc ggacatgagc tacacagagc agacgacgag cgaaccctg gtgatgggag
1081 tggcatctgg gaagacccaa tttgaaggcg cggaaatggg ttttggcggc gagaatgatg
1141 gctgcaaatg tgggtcaaac tgcacctgca atccgtgcac ctgcaaaata tgaccccgggt
1201 cgactcgagc ggccgcatcg tgactgactg acgatctgcc tgcgcgcttt cggtgatgac
1261 ggtgaaaacc tctgacacat gcagctcccg gagacggca cagcttgtct gtaagcggat
1321 gccgggagca gacaagcccg tcagggcgcg tcagcgggtg ttggcgggtg tccgggcgca
1381 gccatgacc agtcacgtag cgatagcggg gtgtataatt cttgaagacg aaagggcctc
1441 gtgatacgcc ttttttata ggtaaatgtc atgataataa tggtttctta gacgtcagg
1501 ggcacttttc ggggaaatgt gcgcggaacc cctatttgtt ttttttcta aatacattca
1561 aatatgtatc cgtcatgag acaataacc tgataaatgc ttcaataata ttgaaaaagg
1621 aagagtatga gtattcaaca tttccgtgtc gcccttattc ccttttttgc ggcattttgc
1681 cttcctgttt ttgctcacc agaaacgctg gtgaaagtaa aagatgctga agatcagttg
1741 ggtgcacgag tgggttacct cgaactggat ctcaacagcg gtaagatcct tgagagttt
1801 gcgccgaag aacgttttcc aatgatgagc acttttaag tctgtctatg tggcgggtg
1861 ttatcccgtg ttgacgccc gcaagagcaa ctcggtcgcc gcatacacta ttctcagaat
1921 gacttggtt agtactcacc agtcacagaa aagcatctta cggatggcat gacagtaaga
1981 gaattatgca gtgctgcat aacctagat gataacactg cggccaact acttctgaca
2041 acgatcggag gaccgaagga gctaaccgct tttttgcaca acatggggga tcatgtaact
2101 cgccttgatc gttgggaacc ggagctgaat gaagccatac caaacgacga gcgtgacacc
2161 acgatgcctg cagcaatggc aacaacgttg cgcaactat taactggcga actacttact
2221 ctagcttccc ggcaacaatt aatagactgg atggaggcgg ataaagtgc aggaccactt
2281 ctgctcctgg cccttccggc tggctggtt attgctgata aatctggagc cggtgagcgt
2341 ggtctcctgg gtatcattgc agcactgggg ccagatggta agccctcccg tatcgtagtt
2401 atctacacga cggggagtca ggcaactatg gatgaacgaa atagacagat cgctgagata
2461 ggtgcctcac tgattaagca ttggttaactg tcagaccaag tttactcata tatactttag
2521 attgatttaa aacttcattt ttaattttaa aggatctagg tgaagatcct ttttgataat
2581 ctcatgacca aatccctta acgtgagttt tcgttccact gagcgtcaga ccccgtagaa
2641 aagatcaaag gatcttcttg agatcctttt tttctgcgcg taatctgctg cttgcaaaaca
2701 aaaaaaccac cgtaccagc ggtggtttgt ttgcccgatc aagagctacc aactctttt
2761 ccgaaggtaa ctggcttcag cacagcgcag ataccaaata ctgtccttct agtctagccg
2821 tagttaggcc accacttcaa gaactctgta gaccgccta catacctcgc tctgctaate
2881 ctgttaccag tggctgctgc cagtggcgat aagtctgttc ttaccgggtt ggactcaaga
2941 cgatagttac cggataaggc gcagcggctg ggctgaacgg ggggttcgtg cacacagccc
3001 agcttgagc gaacgaccta caccgaactg agatacctac agcgtgagct atgagaaagc
3061 gccacgcttc ccgaaggag aaaggcggac aggtatccgg taagcggcag ggtcggaaaca
3121 ggagagcgca cgagggagct tccaggggga aacgcctggt atctttatag tctctcggg
3181 tttcggcacc tctgacttga gcgtcgattt ttgtgatgct cgtcaggggg gcggagccta
3241 tggaaaaacg ccagcaacgc ggccttttta cggttcctgg ccttttctg gccttttct
3301 cacatgttct ttcctgcgct atcccctgat tctgtggata accgtattac cgcctttgag
3361 tgagctgata ccgctcggc cagccgaacg accgagcga gcgagtcagt gagcagggaa
3421 gcggaagagc gcctgatgcg gtattttctc cttacgcatc tgtgcgggat ttcacaccgc
3481 ataaattccg acaccatcga atggtgcaaa acctttcggc gtatggcatg atagcggccg
3541 gaagagagtc aattcaggtt ggtgaatgtg aaaccagtaa cgttatacga tgtcgcagag
```

## Sulfide ions as modulators of metal-thiolate cluster size: Supplementary Material

```
3601 tatgccggtg tctcttatca gaccgtttcc cgcgtggtga accaggccag ccacgtttct
3661 gcgaaaacgc gggaaaaagt ggaagcggcg atggcgggagc tgaattacat tcccaaccgc
3721 gtggcacaac aactggcggg caaacagtcg ttgctgattg gcggttgccac ctccagtctg
3781 gccctgcacg cgccgtcgca aattgtcgcg gcgattaat ctcgcgccga tcaactgggt
3841 gccagcgtgg tgggtgctgat ggtagaacga agcggcgtcg aagcctgtaa agcggcgggtg
3901 cacaatcttc tcgcgcaacg cgtcagtggg ctgatcatta actatccgct ggatgaccag
3961 gatgccattg ctgtggaagc tgccctgact aatgttccgg cgttattttct tgatgtctct
4021 gaccagacac ccatcaacag tattattttc tcccatgaag acggtacgcg actgggctgtg
4081 gagcatctgg tcgcattggg tcaccagcaa atcgcgctgt tagcggggccc attaatgtct
4141 gtctcggcgc gctcgcgtct ggctggctgg cataaatatc tcaactgcaa tcaaatccag
4201 ccgatagcgg aacgggaagg cgactggagt gccatgtccg gttttcaaca aaccatgcaa
4261 atgctgaatg agggcatcgt tcccactgcg atgctggttg ccaacgatca gatggcgtg
4321 ggcgcaatgc gcgccattac cgagtccggg ctgcgcggtg gtgcggtat ctcggtagt
4381 ggatacgacg ataccgaaga cagctcatgt tatatcccgc cgttaaccac catcaaacag
4441 gattttcgcc tgctggggca aaccagcgtg gaccgcttgc tgcaactctc tcagggccag
4501 gcggtgaagg gcaatcagct gttgcccgtc tcaactggtg aaagaaaaac caccctggcg
4561 cccaatacgc aaaccgcctc tccccgcgcg ttggccgatt cattaatgca gctggcacga
4621 caggtttccc gactggaaag cgggcagtga gcgcaacgca attaatgtga gttagctcac
4681 tcattaggca ccccaggctt tacactttat gttccggct cgtatgttgt gtggaattgt
4741 gagcggataa caatttcaca caggaacag ctatgacat gattacggat tcaactggcg
4801 tcgttttaca acgtcgtgac tgggaaaacc ctggcgttac ccaacttaat cgccttgtag
4861 cacatcccc tttcgccagc tggcgtaata gcgaagaggc ccgcaccgat cgcccttccc
4921 aacagttgcg cagcctgaat ggcgaaatggc gctttgctg gtttcgggca ccagaagcgg
4981 tgccggaaag ctggctggag tgcgatcttc ctgaggccga tactgtcgtc gtcccctcaa
5041 actggcagat gcacggttac gatgcgcca tctacacaa cgtaacctat cccattacgg
5101 tcaatccgcc gtttgttccc acggagaatc cgacgggttg ttactcgtc acatttaatg
5161 ttgatgaaag ctggctacag gaaggccaga cgcgaattat ttttgatggc gttggaatt
```

//

### Amino acid sequence of expressed fusion protein

```
Met S P I L G Y W K I K G L V Q P T R L L L E Y L E E K Y E E H L Y E R D E G D
K W R N K K F E L G L E F P N L P Y Y I D G D V K L T Q S Met A I I R Y I A D K
H N Met L G G C P K E R A E I S Met L E G A V L D I R Y G V S R I A Y S K D F E
T L K V D F L S K L P E Met L K Met F E D R L C H K T Y L N G D H V T H P D F
Met L Y D A L D V V L Y Met D P Met C L D A F P K L V C F K K R I E A I P Q I D
K Y L K S S K Y I A W P L Q G W Q A T F G G G D H P P K S D L V P R G S E N L Y
F Q S C C G G N C G C G S S C K C G S G C G G C K Met Y P D Met S Y T E Q T T S
E T L V Met G V A S G K T Q F E G A E Met G F G A E N D G C K C G S N C T C N P
C T C K
```

GST

Thrombin

TEV

cicMT2

BamH1 ggatcc

XmaI cccggg

MfeI caattg

## Sulfide ions as modulators of metal-thiolate cluster size: Supplementary Material

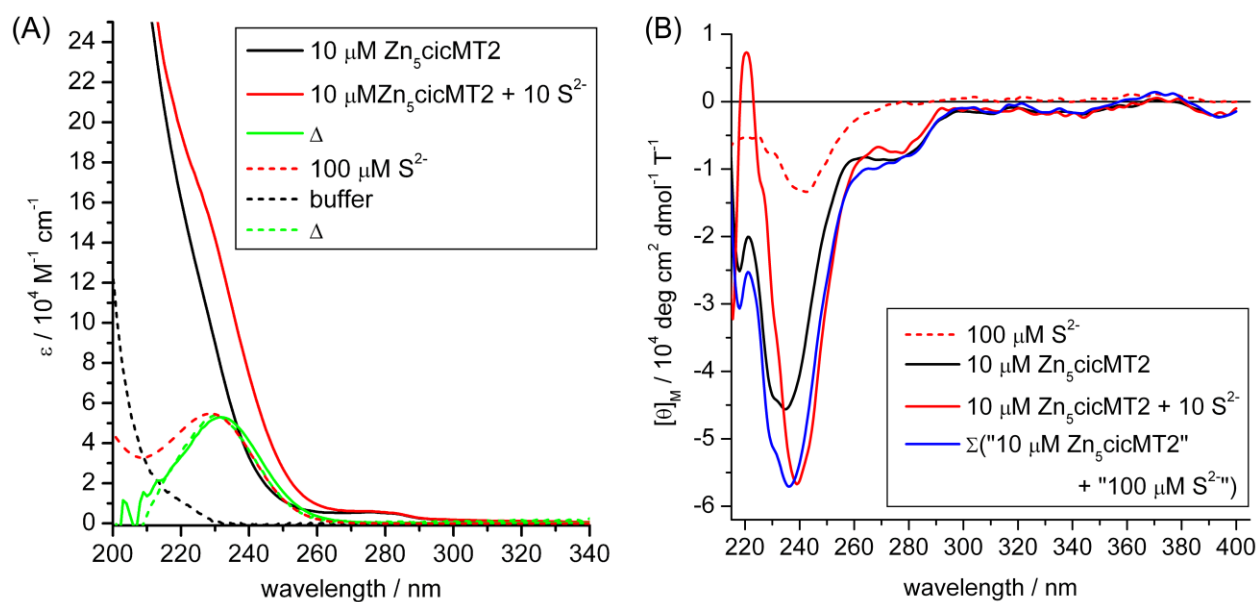

Fig. S1 Influence of sulfide ions on the spectroscopic features of Zn<sub>5</sub>cicMT<sub>2</sub>. (A) UV spectra of Zn<sub>5</sub>cicMT<sub>2</sub> in absence (black solid line) and presence of 10 equiv. of sulfide ions (red solid line). The green solid line is the delta-spectra obtained by subtraction of the Zn<sub>5</sub>cicMT<sub>2</sub> absorption from the absorption of Zn<sub>5</sub>cicMT<sub>2</sub> in presence of 10 equiv. of sulfide. To analyse the contribution of free sulfide ions, a spectrum of a 100 μM Na<sub>2</sub>S solution was recorded (red dashed line). The delta spectrum of the latter spectrum and the buffer (10 mM Tris-HCl, pH 7.3, black dashed line) results in the calculated green dashed spectrum. Both green spectra are virtually identical indicating the absence of interaction between Zn<sub>5</sub>cicMT<sub>2</sub> and sulfide ions under these conditions. (B) MCD spectra of Zn<sub>5</sub>cicMT<sub>2</sub> in absence (black) and presence of 10 equiv. of sulfide ions (red). The red dashed spectrum was recorded with a solution containing 100 μM sulfide ions in form of Na<sub>2</sub>S, the blue spectrum is the sum of the black and red dashed spectra.

### Sulfide ions as modulators of metal-thiolate cluster size: Supplementary Material

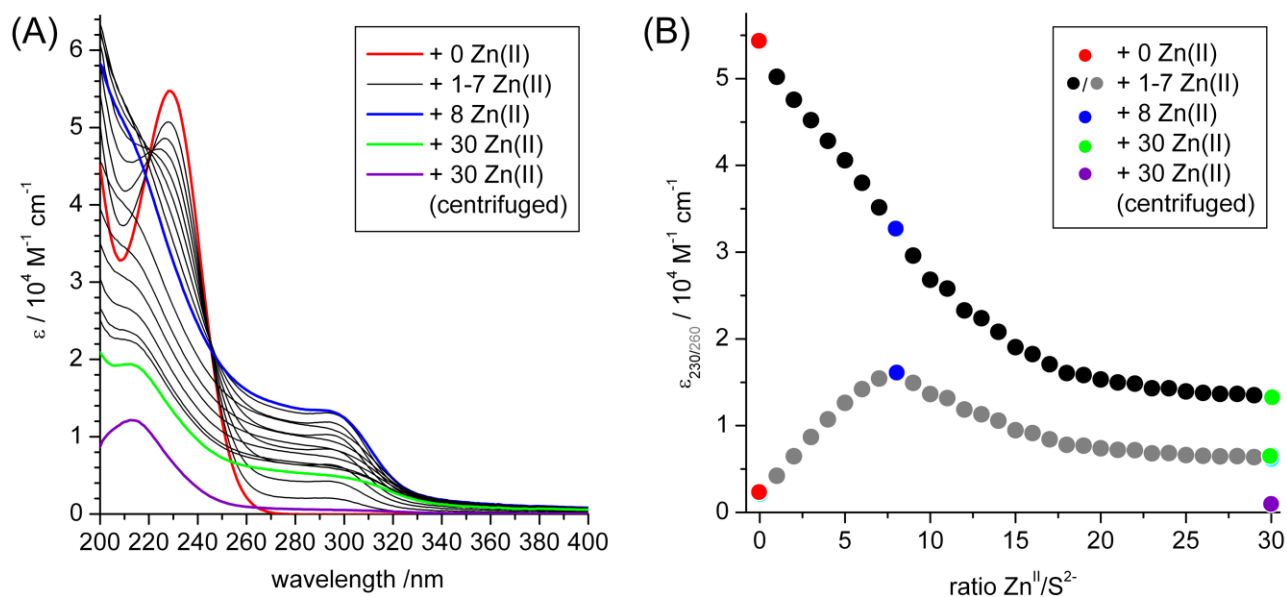

Fig. S2 (A) UV spectra of the titration of a 100 μM Na<sub>2</sub>S solution with increasing amounts of Zn(II) ions. Certain spectra are highlighted in colour according to the legend. (B) Molar absorptivity plots at 230 (black and coloured dots) and 260 nm (gray and coloured dots) from the spectra shown in (A). The red spectrum in (A) is the same as in Fig. S1A.

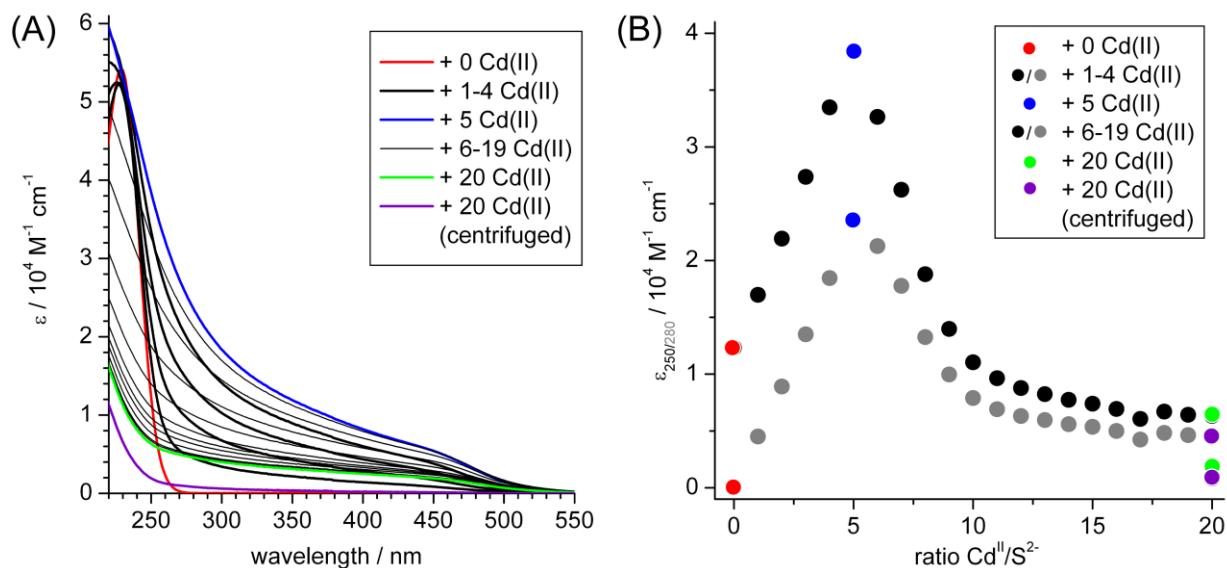

Fig. S3 (A) UV spectra of the titration of a 100 μM Na<sub>2</sub>S solution with increasing amounts of Cd(II) ions. Certain spectra are highlighted in colour according to the legend. (B) Molar absorptivity plots at 250 (black and coloured dots) and 280 nm (gray and coloured dots) from the spectra shown in (A).

### Sulfide ions as modulators of metal-thiolate cluster size: Supplementary Material

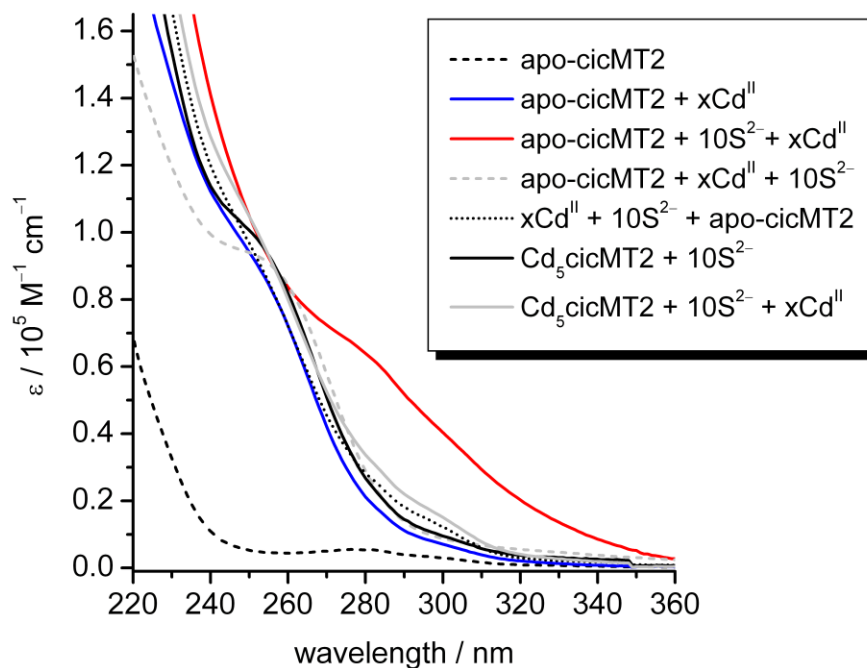

Fig. S4 Probing the mechanism of cluster formation with incorporated sulfide ions. Starting from apo-cicMT2 the order of MT,  $\text{Cd}^{\text{II}}$ , and sulfide addition was varied. Apparently, only when apo-cicMT2 was first incubated with sulfide ions and only then titrated with increasing amounts of  $\text{Cd}^{\text{II}}$  (red spectra), formation of sulfide containing Cd-thiolate clusters was observed.

## Sulfide ions as modulators of metal-thiolate cluster size: Supplementary Material

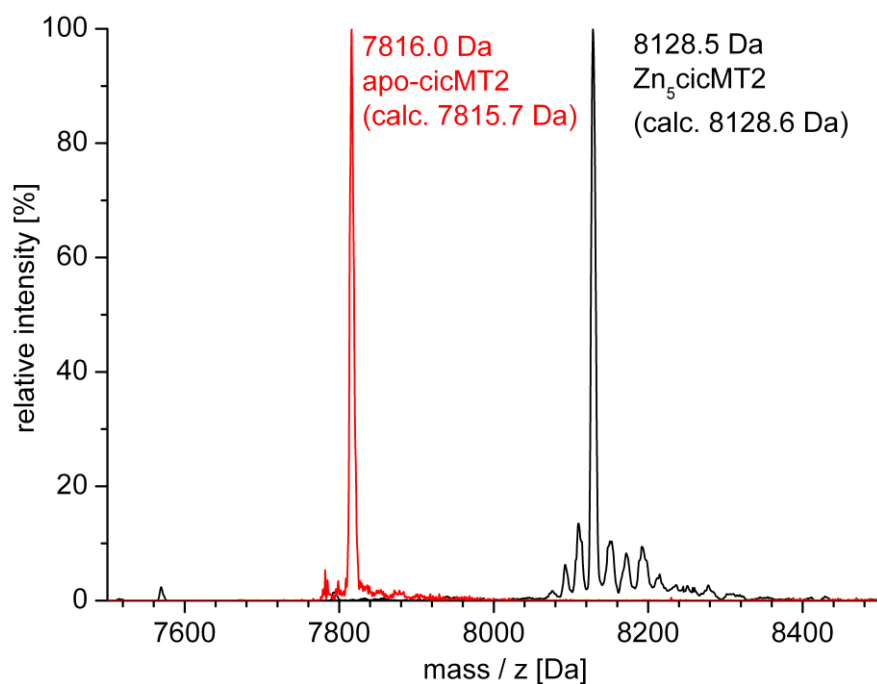

Fig. S5. Deconvoluted ESI<sup>+</sup>-MS spectra of Zn<sub>5</sub>cicMT2 from GST-thrombin-TEV-cicMT2 cleaved with TEV protease measured at acidic pH (pH 2, red line) and neutral pH (pH 7, black line), with a normalized intensity of 100 %. Additional peaks of the sample at pH 7 arise from Na<sup>+</sup>-adducts of the Zn<sub>5</sub>-form and to a minor extent also from of the Zn<sub>4</sub>-form.
